# Supplementary material for: Investigation of the effect of cucurbit[7]uril complexation on the photophysical and acid–base properties of the antimalarial drug quinine
Source: Royal Society of Chemistry journal article supplement (doi:10.1039/c6cp04931a), 2016-01-01
Supplement: c6cp04931a1.pdf [file c6cp04931a1.pdf]

## Electronic Supporting Information

# Investigation of Cucurbit[7]uril Complexation on Photophysical and Acid-Base Properties of an Antimalaria Drug Quinine

*Suman Mallick, Kaushik Pal, Falguni Chandra and Apurba L. Koner\**

Department of Chemistry, Indian Institute of Science Education and Research Bhopal, Bhopal Bypass Road, Bhauri, Bhopal-462066, India.

**Corresponding Author:** \* E-mail: [akoner@iiserb.ac.in](mailto:akoner@iiserb.ac.in), Fax: +91-755 6692 392; Tel: +91-755 6692 376.

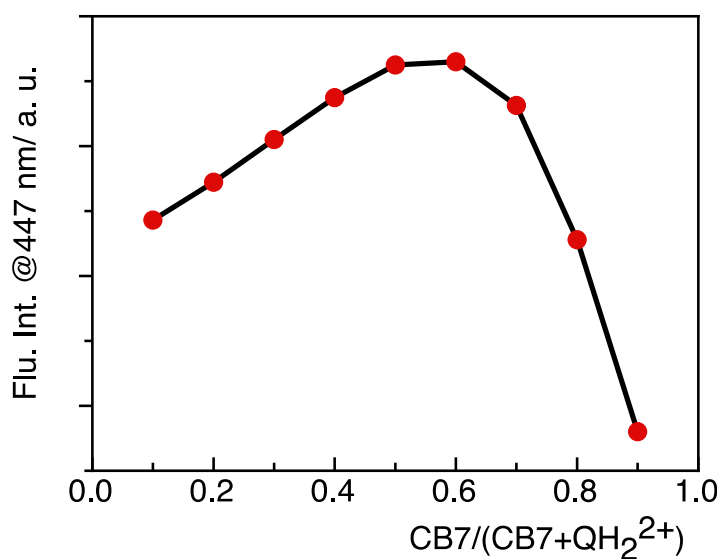

**Fig S1:** Job's plot showing a maximum around 0.66 mole fraction, corresponds to 2:1 complexation.

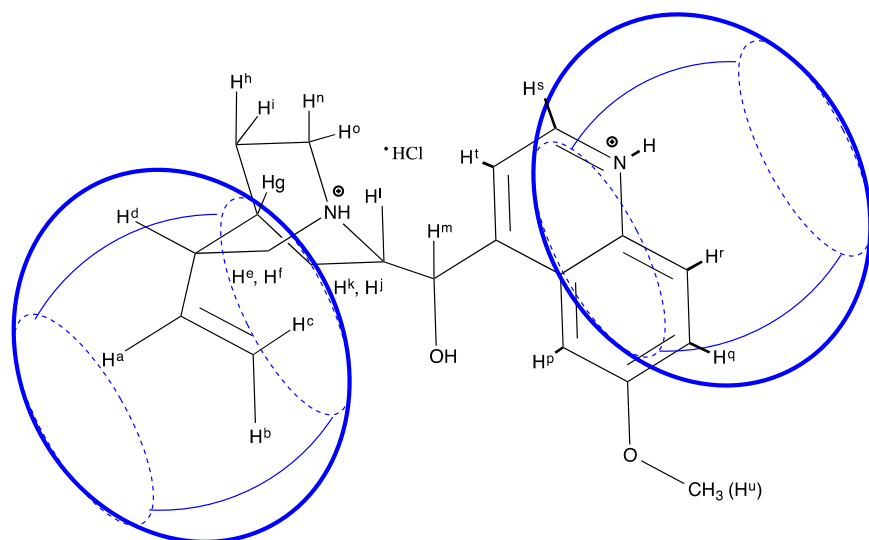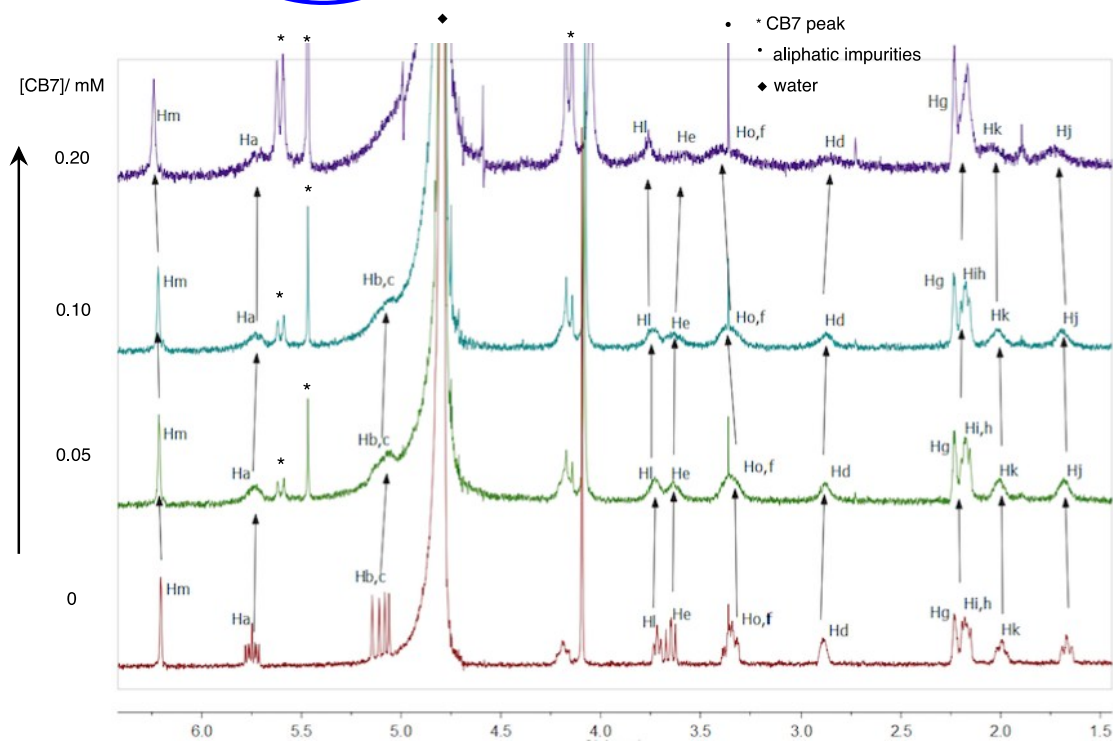

**Fig S2:** Aliphatic part of  $^1\text{H}$  signal  $\text{QH}_2^{2+}$  from the NMR titration between 0.5 mM  $\text{QH}_2^{2+}$  and increasing concentration of CB7. Arrow shows complexation-induced chemical shift upon complexation with CB7.

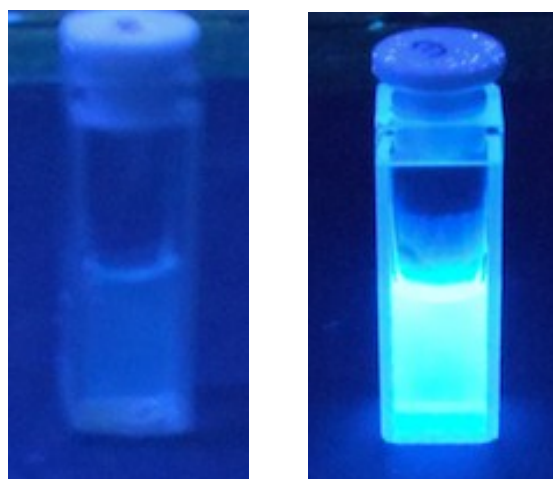

0.8 mM QHCl  
in 0.1 (N) HCl  
without CB7

0.8 mM QHCl  
with 1.3 mM  
CB7 at pH 3.0

**Fig S3:** Digital photograph of 0.8 mM Quinine Hydrochloride at 0.1 (N) HCl and the solution containing 1.3 mM CB7 at pH 3.0 showing complexation induced fluorescence enhancement under hand-held UV (365 nm) light.

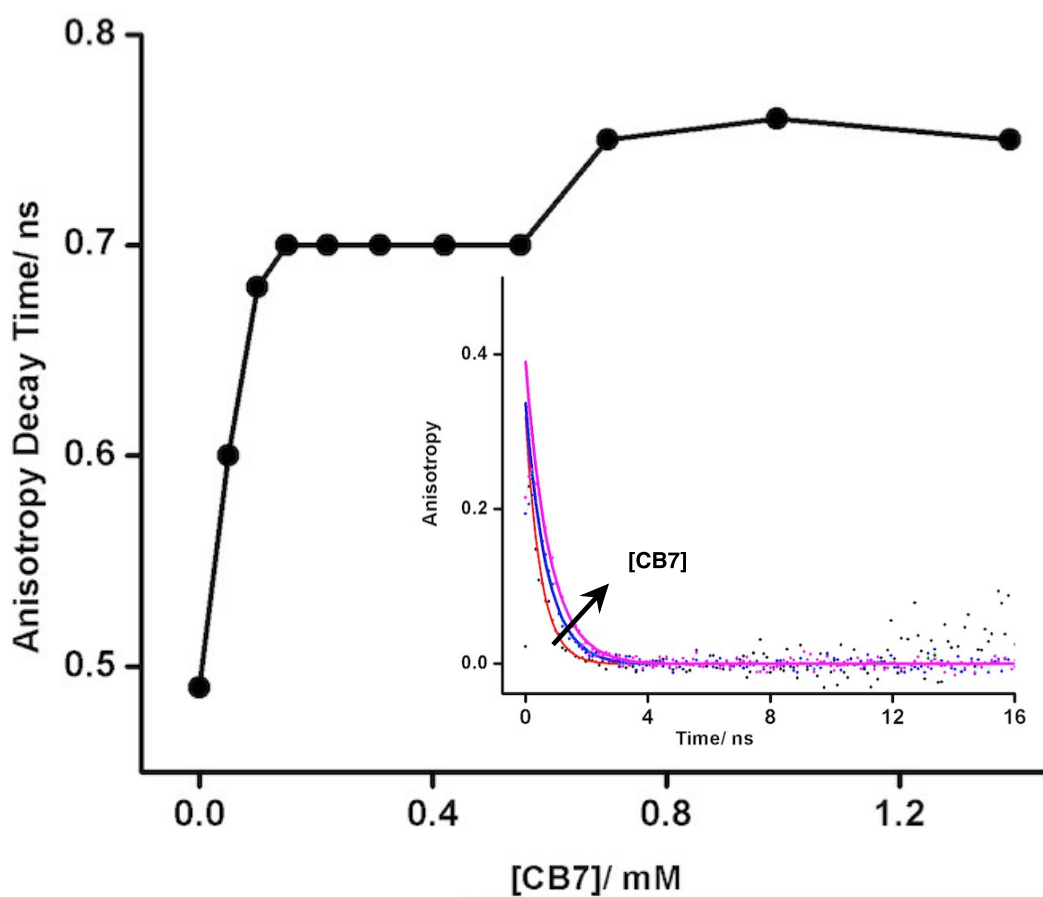

**Fig S4:** Plot of time-resolved fluorescence anisotropy decay time with increasing concentration of CB7 at pH 2.7 Stepwise changes in fluorescence anisotropy decay time indicate a 2:1 complexation with Quinine and CB7. Inset shows time-resolved anisotropy decay with increasing concentration of CB7.

## 2:1 equation for the determination of binding constants using UV-Vis and fluorescence titration

$$OD = \varepsilon_Q[Q] + \varepsilon_{CB7 \cdot Q}[CB7 \cdot Q] + \varepsilon_{[(CB7)_2 \cdot Q]} [(CB7)_2 \cdot Q]$$

and

$$Intensity = I_Q[Q] + I_{CB7 \cdot Q} [CB7 \cdot Q] + I_{[(CB7)_2 \cdot Q]} [(CB7)_2 \cdot Q],$$

$$\text{Where } [Q] = \frac{[Q]_0}{1 + K_1[CB7] + K_1K_2[CB7]^2}$$

$$[CB7 \cdot Q] = \frac{K_1[CB7][Q]_0}{1 + K_1[CB7] + K_1K_2[CB7]^2}$$

$$[(CB7)_2 \cdot Q] = \frac{K_1K_2[CB7]^2[Q]_0}{1 + K_1[CB7] + K_1K_2[CB7]^2}$$

$$K_1K_2[CB7]^3 + K_1(2K_2[Q]_0 - K_2[CB7]_0 + 1)[CB7]^2 + (K_1[Q]_0 - K_1[CB7]_0 + 1)[CB7] - [CB7]_0 = 0$$

by solving this cubic equation we can find out  $K_1$  and  $K_2$

**Estimating  $pK_a$  shift from the binding constant values of protonated and non-protonated dye with host molecule.**

$$\log[(K_1K_2)_{pH=2.7}/(K_1K_2)_{pH=9.0}] = \Delta pK_a, K_1K_2 = \text{overall binding strength}, (K_1K_2)_{pH=2.7} =$$

overall binding strength of the doubly protonated Quinine and  $(K_1K_2)_{pH=9.0} =$  overall binding strength of the mono-protonated Quinine

**Fluorescence lifetime values of Quinine with and without CB7 along with fitting parameters**

**Table S1: Fluorescence lifetime of  $\text{QH}_2^{2+}$  at pH  $\sim 2.2$  by exciting at 280 nm**

| $\lambda_{\text{mon}}$<br>(nm) | $\tau_1$ (ns) | $\tau_2$ (ns) | $a_1$ | $a_2$ | $\tau_{\text{av}}$ (ns) | $\chi^2$ |
|--------------------------------|---------------|---------------|-------|-------|-------------------------|----------|
| 430                            | 1.5           | 4.7           | 5.0   | 95.0  | 4.6                     | 1.1      |
| 460                            | -             | 4.9           | -     | 100   | 4.9                     | 1.1      |
| 490                            | 0.4           | 4.8           | -7.0  | 107.0 | 4.8                     | 1.2      |

**Table S2: Fluorescence lifetime of  $\text{QH}^+$  at pH  $\sim 9.0$  by exciting at 280 nm**

| $\lambda_{\text{mon}}$<br>(nm) | $\tau_1$ (ns) | $\tau_2$ (ns) | $\tau_3$ (ns) | $a_1$ | $a_2$ | $a_3$ | $\tau_{\text{av}}$ (ns) | $\chi^2$ |
|--------------------------------|---------------|---------------|---------------|-------|-------|-------|-------------------------|----------|
| 380                            | 2.3           | 0.2           | 5.0           | 55.0  | -5.0  | 50.0  | 4.1                     | 1.2      |
| 460                            | 5.1           | 0.4           | 16.4          | 52.3  | -4.3  | 52.0  | 13.7                    | 1.0      |

**Table S3: Fluorescence lifetime of  $\text{QH}_2^{2+}$  in presence of 1.5 mM CB7 at pH 2.2 by exciting at 375 nm**

| $\lambda_{\text{mon}}$ (nm) | $\tau_1$ (ns) | $\tau_2$ (ns) | $a_1$ | $a_2$ | $\tau_{\text{avg}}$ (ns) | $\chi^2$ |
|-----------------------------|---------------|---------------|-------|-------|--------------------------|----------|
| 430                         | 4.9           | 30.6          | 4.6   | 95.4  | 30.4                     | 1.1      |
| 460                         | 11.7          | 31.2          | 6.9   | 93.1  | 30.7                     | 1.0      |
| 490                         | 16.8          | 31.8          | 13.5  | 86.5  | 30.6                     | 1.0      |

**Table S4: Fluorescence lifetime of  $\text{QH}^+$  in presence of 1.5 mM CB7 at pH 10.5 by exciting at 375 nm**

| $\lambda_{\text{mon}}$ (nm) | $\tau_1$ (ns) | $\tau_2$ (ns) | $a_1$ | $a_2$ | $\tau_{\text{avg}}$ (ns) | $\chi^2$ |
|-----------------------------|---------------|---------------|-------|-------|--------------------------|----------|
| 380                         | 3.3           | 8.3           | 88.8  | 11.2  | 4.5                      | 1.0      |
| 460                         | 4.3           | 20.7          | 23.0  | 77.0  | 19.7                     | 1.1      |

**Table S5: Fluorescence lifetime of  $\text{QH}_2^{2+}$  at pH ~2.2 by exciting at 340 nm**

| $\lambda_{\text{mon}}$ (nm) | $\tau_1$ (ns) | $a_1$ | $\tau_{\text{av}}$ (ns) | $\chi^2$ |
|-----------------------------|---------------|-------|-------------------------|----------|
| 460                         | 4.9           | 100   | 4.9                     | 1.1      |

**Table S6: Fluorescence lifetime of  $\text{QH}_2^{2+}$  in presence of 1.4 mM CB7 at pH ~ 2.2 exiting at 340 nm**

| $\lambda_{\text{mon}}$ (nm) | $\tau_1$ (ns) | $\tau_2$ (ns) | $a_1$ | $a_2$ | $\tau_{\text{avg}}$ (ns) | $\chi^2$ |
|-----------------------------|---------------|---------------|-------|-------|--------------------------|----------|
| 460                         | 6.8           | 30.3          | 6.5   | 93.5  | 30.1                     | 1.1      |

**Table S7: Fluorescence lifetime of QH<sup>+</sup> at pH 12.5 by exciting at 340 nm**

| $\lambda_{\text{mon}}$ (nm) | $\tau_1$ (ns) | $\tau_2$ (ns) | $\tau_3$ (ns) | $a_1$ | $a_2$ | $a_3$ | $\tau_{\text{av}}$ (ns) | $\chi^2$ |
|-----------------------------|---------------|---------------|---------------|-------|-------|-------|-------------------------|----------|
| 460                         | 0.8           | 7.0           | 0.2           | 19.6  | 29.6  | 50.8  | 6.3                     | 1.1      |

**Table S8: Fluorescence lifetime of QH<sup>+</sup> in presence of 1.5 mM CB7 at pH 12.5 by exciting at 340 nm**

| $\lambda_{\text{mon}}$ (nm) | $\tau_1$ (ns) | $\tau_2$ (ns) | $\tau_3$ (ns) | $a_1$ | $a_2$ | $a_3$ | $\tau_{\text{av}}$ (ns) | $\chi^2$ |
|-----------------------------|---------------|---------------|---------------|-------|-------|-------|-------------------------|----------|
| 460                         | 3.7           | 19.6          | 0.1           | 16.8  | 70.8  | 12.4  | 18.9                    | 1.1      |

# $^1\text{H}$ NMR of Cucurbit[7]uril

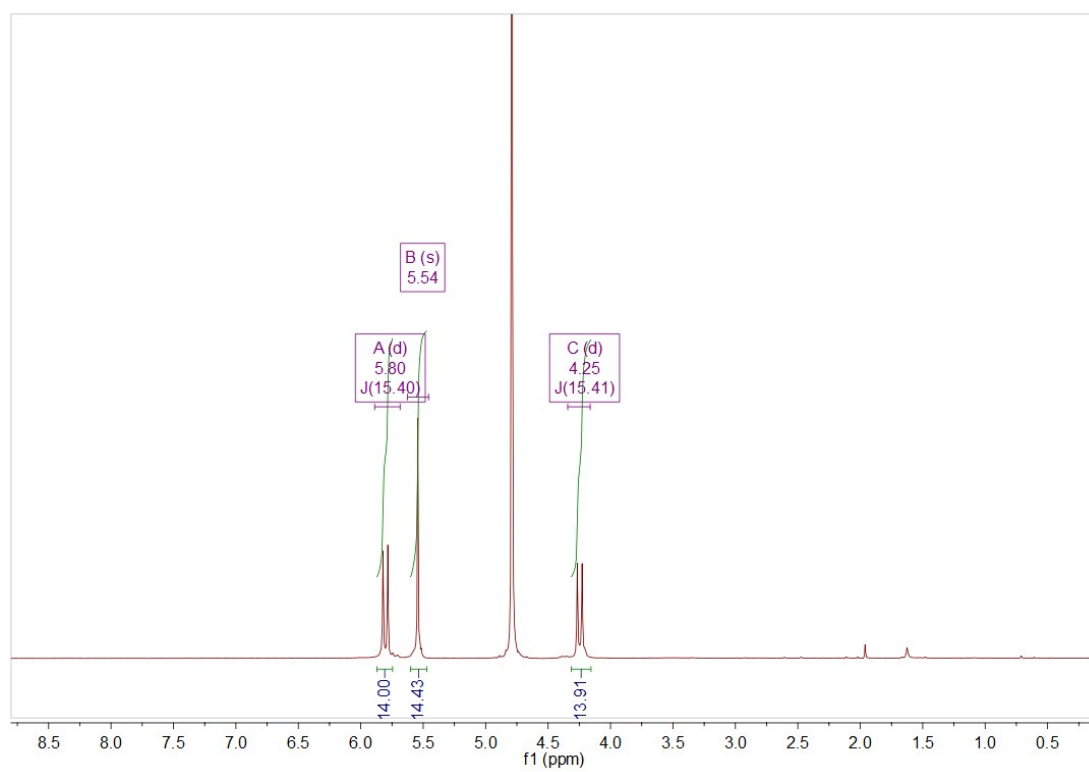

$^1\text{H}$  NMR (400MHz,  $\text{D}_2\text{O}$ ) :  $\delta$  (ppm) 5.80 (d, 14H,  $J=15.40\text{Hz}$ ), 5.54 (s, 14H), 4.25 (d, 1H,  $J=15.41\text{Hz}$ )



# Low Resolution Mass Spectrometry of Cucurbit[7]uril

LC-MS REPORT  
IISER - BHOPAL

=====  
Data file : D:\DATA\02-9-2015\_6 2015-09-02 16-29-33\ALK-AA-CBN.D  
Injection Date : 9/2/2015 Vial No. : Vial 21  
Sample Name : ALK-AA-CBN Injection vol : 5.00 ul  
Acq Method : D:\DATA\02-9-2015\_6 2015-09-02 16-29-33\DIRECT INJECTION\_BO  
=====

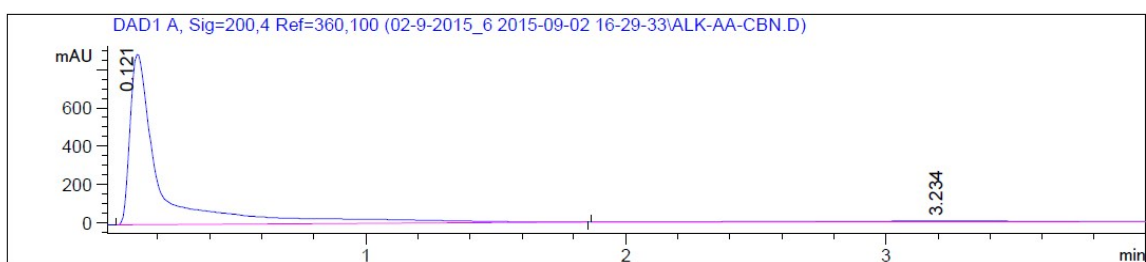

| Peak No | RT min | Area       | Area % |
|---------|--------|------------|--------|
| 1       | 0.121  | 7.325e+003 | 96.210 |
| 2       | 3.234  | 2.885e+002 | 3.790  |

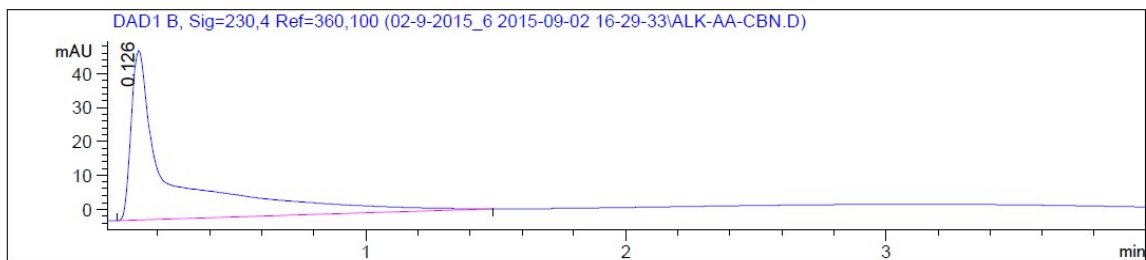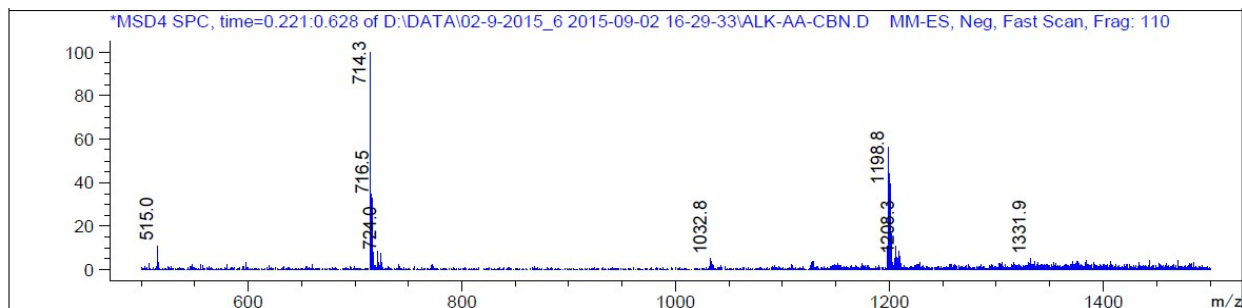

Molecular mass [M] calculated for Cucurbit[7]uril = 1162.34,

mass obtained = 1198.8 [M+2H<sub>2</sub>O]
